# Supplementary material
Source: PubMed Central journal article supplement (PMC3249360)
Supplement: supp_111.133983_133983SI.pdf [file supp_111.133983_133983SI.pdf]

**EP155** MSFSDEKEPVNLLALDGGGIRGVSELIILDELMKQIQIRGNLARVPRPCVYFHLMGGTSTGGLVAIMLGRLEMSTEEALSAYDKFAQEIF 90  
**EP146** MSFFDEKEPIINLLACDGGGIRGVSELVILHELMKAIQEKGEFARMKPCDYFHIIGGTSTGGLVAIMLGRLEMSTEEAIAAYDGFASDIF 90

SKKNRNMNLPAAEKYGAVALAQTVQKLVHDCQKGPMSMRDCRFPYAKGRAFVCTMPQHDRNATVRLRITYDVEGDKFSKCOIQYQAAARATTAAS 180  
 SKRRPSLV---EKYKAKQLEATVQRLVRDQGGKILMRDGRPRNSKGRAFVCTMPEQKHRQTVRLRAYEAGDKYPNVLIYEAAARATTAAT 177

TFFKPMPITQNDQGVVTNFVDAALGRNPFVGIILEEAGSLFGTRRRLGCVVS LGTGSRKTEFLAK-GKSKAKQLVSLLSVLKEISTDTQRDH 269  
TYERPMSIRDEDDGREERFVDAALGMNPFISICL EEAELFGPQRM LGCI VSLGTGSRQVEMRPYGS GSIRYLWRTIKVVK EIGT DSEKDH 267

ERMLSMLKFPDITYFRINVDGGAEKISIDDWGKICLLKERTRKYLDKAVADCIDKLA KALLRGTS HGLTLAHLGCLDKDVIIRDTQKAK 359  
 EKIRAHFADYDNTYFRFNVDGGAQGITELSDWQKIGELKERTRAYLQTPDKKSIDDLADVIVHHRTHGLTLNQGRGINKNMTIPAPQRFI 357

ERGRASTIFTRATIILKTLREHFNRQDSGDSVSRREFQRLWGMGGVVKTKQIALKFSEEFERNDYKILWIDATDVYTI EQSYLRIVEKDLQPE 449  
 RGRSSNTFTGRDNILRRLDECFEPAPGNTSRREFQLRGMS---RAKLG MCTAALMRGIRFHIIWIDATDKVTIEQSFHHIATS YFGTE 444

NRGDAITRLLGKLEASDKWLLVFDNAPERGLGPWIPDGNSGNIYTTTRLKHLEERLAFNCVSYVDQMDVADGLTLLLR SARMDEGEKQY 539  
 GDTQPVEKVINWLKETAEWLLVFDNAPDSGLFRYPDGDIGNFLYTTTRHQNLPRLQPFIQDVEEMEQEAAQLLIASAQVPSNIEAN 534

RDLARPVAKELGYLPLALDQAGACKLTIPCSKSSCTTPIFSFFPSFSRPSLPPFFSVPRELLTSCLPDIHM APCPLERFLEKFNNEKDA 629  
RKVVDIVKELGLLPLALDQAGAY-----IHM APCQLDKYLDVFNKQKQD 579

LLSNPMFRGBDNIRNLPYATFNISWDAIKAYADKRDVERATEALNALQLLNLLCFYHNEGFI AQMFGYAAKNRAVYDLTSAHLEAEG 719  
 LLKDPQFTGDEARHIAVYATFNISFKAIKTSSEKRGDLTKARHAEVALMLLRLLCFYHNEGGLLFVVEIYAAKERHKLDRNTYFVKAGD 669

ISLEHLIHMSYTED-FDMP-GNEWNRGGFDMGIRFLEEFSLLRKH DYRNLHTNMHILVHEWARRLTPGQRAEWGGAARRILLDSFNFESL 807  
 VDINELVEITEQDISPEFEDGQAWVNI GWIESVKLLEEFSLIKFNASNGYSSMHVLVHDWARSCMEDEEKREWAL AARCLLMDSI SLGTD 759

GSSIAHRREMVVHLDACVRFVDPDNQKVDLEPEYHFNIANIYEAANRFEDARLAREKSTFFALRRAAGFFTENVLMYMYMQADDY GSHCD 897  
 RLSAHWHKLI MPHLQVVMKYANIPHADLGLSEYQIRMARALRQSHKFKHANTALQ QALDYR-KKYFGIDDLHTFDVVRHLRLYEDQGL 848

IAQAEQMYLEILDRFQLIVDQAKWQIIPSRKGRSMLKLSRDEKNADNRREVLDFNLARDTKASLAFLYFEQGHYESAEPHLLDILEWA 987  
 FAEAESMLLELIDRRRLQIRDKMWTAALETNST---DATREVEMPAFYSEKLLDNAALNTDTKQLLIVLMKMDSRQA AEKVMVDLLKWT 934

KQDTGREKERAVIRARXYLATIANPSGARPSETS---EEAKAKYLAREEESGSDSFGTQSLRRNFALQIVREGKLEBEALDEYHPITLWLY 1073  
 SEKFGEDNSKTRFWQ-DTLDQFRRGLDVRDTEDSLTRVERAREEVVKVSEYQYGFPEPQLGAERQLAKALELDGAFQEAADRLTYIIEYC 1023

CDKYGKESNKTRQVLDAMVLTMHK VAPCHGFTANVLI MSFSWNHFTFGPQHLETLESRGLADVLCDM CALGKALELAEGSVKIARAIYG 1163  
 ELIYGKHS LQHIDAI FAMA KSLNQQMRPY-EADEILVTVLDRYGTLLGQQHPKTLEARYEIGFNRF LRSYDTGAI EAMKECYDRRKEVLG 1112

EGGRTTLYHIDEYRRIRELYETMPLFIRLRVIQDKILEEKKAPLTFGPLEHEYSEKLADPEPHIATPLTPEGTEVRVVKEEIPLTFGVAL 1253  
 SDHWLTKMTGVHLAHFQHMDKMVPWNRD-SLKEIAVEN-----T--LKNMGDLAPEW MKQWKP-----GMCL 1172

RYKQLDVAAADFQIPSL EAIIPDTWLLLCRDAKSDPK-FRDPGPFNFDRFLKRYKEGL. 1311  
 EN-AVSISPNSNF-S-----ILCRTRRGDHAGSGCPG. 1204

**Figure S1** Amino acid alignment of candidate *vic2* alleles in strain EP155 (*vic2-2*) and in strain EP146 (*vic2-1*) performed using MegAlign in Lasergene (DNASTAR Inc. Madison WI). Note the high level of polymorphism that spans nearly all of the patatin-like protein (39% identity). A region in the N-terminal portion of the ORF (aa 13-212 in the EP155 sequence) containing a patatin-like phospholipase domain (PLA2; EC3.1.1.4) consisting of the esterase box GTSTG and anion binding element DGGGXRG (Scherer et al., 2010 Patatin-related phospholipase A: nomenclature, subfamilies and functions in plants. *Trends in Plant Science* 15:693-700), and conserved in both the *vic2-1* and *vic2-2* alleles, is underlined. An NB-ARC, or P-loop NTPase domain, detected in the EP155 genome sequence but not in the EP146 sequence, is indicated by an overline extending from aa 396-561. Amino acid identity is indicated by the solid background, while dashes indicate deletion events.

```

EP155 MGFFSKKKKDGNANPYAQDGAQVPFSNPLTPYQARNDLAQGRPAGLSSSTAPTASNTPPPSYHSPSIASSRYGDEKYGNCKGYCTDRYG 90
EP146 MGLFSKKKKDAEANPYAQAG-----TAFAPAVSNTPPPSYHSPSIASSRYGDEKLCTQNGYCADRYG 62

STGSGPAPGGYGGFNSDAGNNRSQASAAQPAGGDRNPALFGNAQERYNPNYGGSKPQAQSGPQGDEYGGYGAPRELTEEEQAEAQAQAHVD 180
---SGPAPGGYGGFNFAGNNRSQASTATPAAGDGNPALFGNAKDRYNPNYGGSKPQAQSGPEGDEYGGYGAPRELTEEEQAEADTQALVD 148

EAHGVRNESITAALQRTLAMGNQAFEQATGTLVRIDQQDEMMFNANKNLDSSLAHARDCAKTKTLRKLNDTPFFIPVE-PGRKAQDKLAE 269
QTNAVRDESWASIQRTIGGIEGGLAQVQASRMRVAQQDSRLNNAERNLDCSLSHARDCACKTKTLDTLNRKPFFMPVGGTSVKAVERQVA 238

MAVLNNRQDREQREQTLQAGYTDRQKMEQDMQQLAR-ASSGPRLLGAGKPEAN-KFALEEDDEEGCAQEEQTGGLMDDVLVVSKNLNMASSA 357
QETEEHSGDKAKAEVTRQA----RWEIEKRLKAAEKNGPTAEGLLGSKKPEVDSKWVFEDDEEGCAKEENTQAGIETLGYLSGQLNSQASA 324

MTGKLERSIAQINDVSGKVCSPFRTLLQSRSLTSGAG. 395
LGDDLQCSIKVINRVVDKVWSPPRWLQTNLLTFDAG. 362

```

**Figure S2** Amino acid alignment of the Sec9-like protein candidate *vic2a* alleles in strain EP155 (*vic2a-2*) and EP146 (*vic2a-1*). Note the large indel near the N-terminus and the high level of polymorphism in the C-terminal half of the coding region. A Pfam DUF3359 domain, found only in the EP155 allele, is indicated by a line above the EP155 sequence. Amino acid identity is indicated by the solid background, while dashes indicate indels.

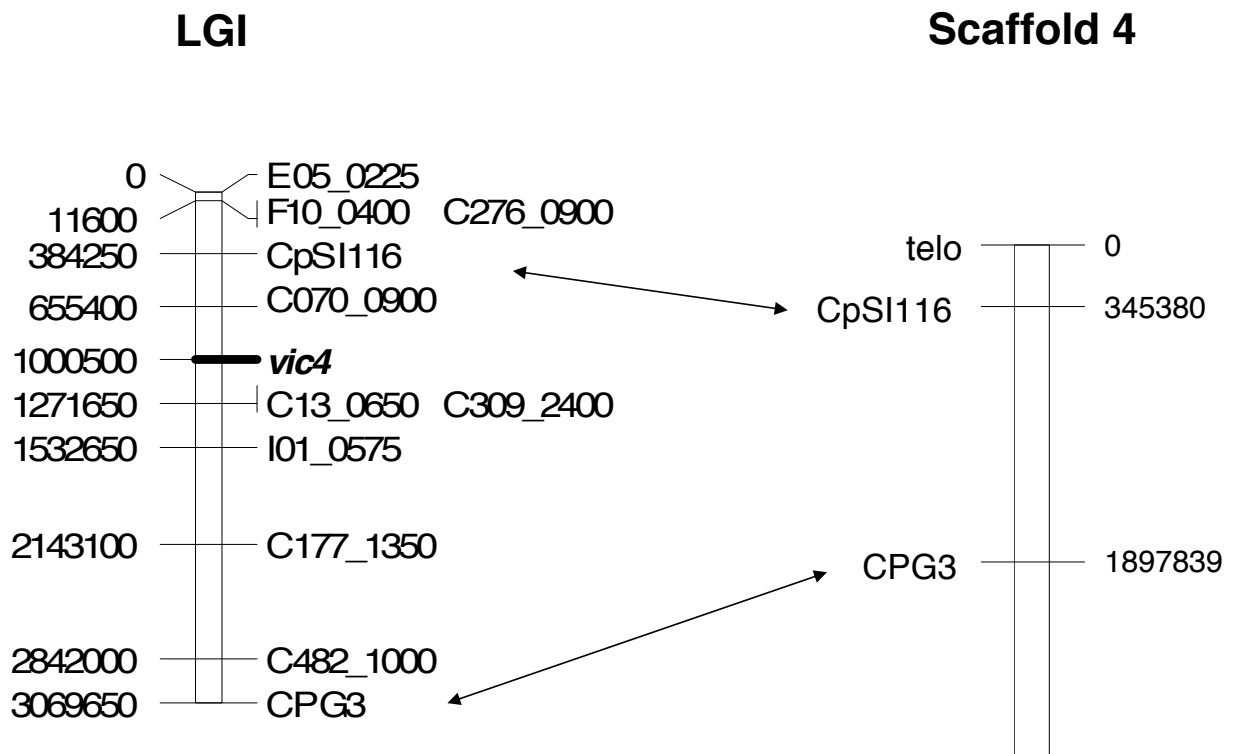

**Figure S3** Alignment of linkage group LGI of the *C. parasitica* genetic linkage map generated by Kubisiak TL, Milgroom MG (2006 *Fungal Genetics and Biology* **43**: 453-463) that contains the position of the *vic4* genetic locus with Scaffold 4 of version 2 of the *C. parasitica* genome sequence. The estimated physical distance (bp) of each marker from the end of the linkage group (shown on the left side of the linkage map) was calculated using the estimate of 1cM = 14.5 kbp (Kubisiak and Milgroom, 2006 *Fungal Genetics and Biology* **43**: 453-463). Markers linking the physical and genetic maps are connected by double arrows.

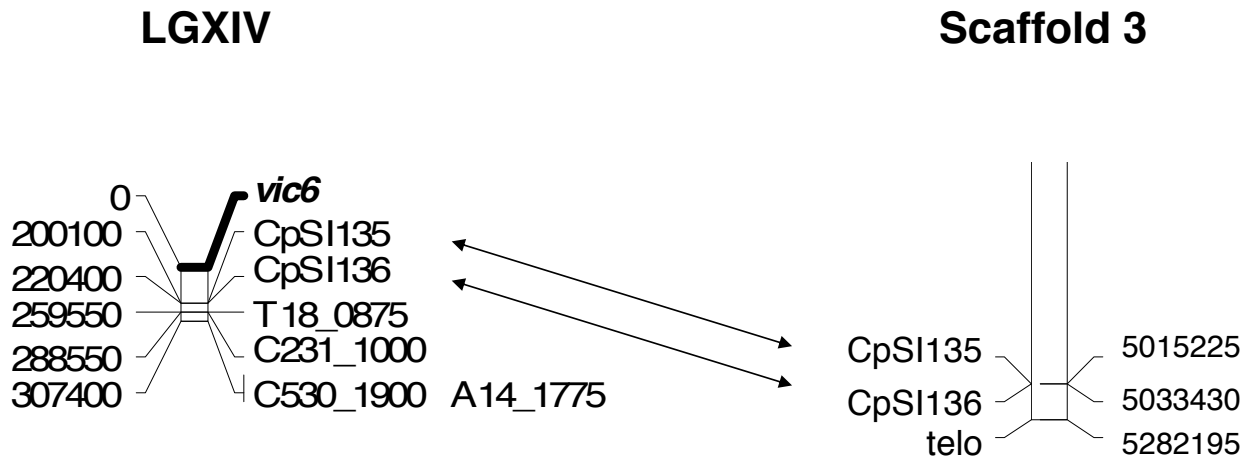

**Figure S4** Alignment of linkage group LGXIV of the *C. parasitica* genetic linkage map generated by Kubisiak and Milgroom (2006 *Fungal Genetics and Biology* **43**: 453-463) that contains the position of the *vic6* genetic locus with Scaffold 3 of version 2 of the *C. parasitica* genome sequence. The estimated physical distance (bp) of each marker from the end of the linkage group (shown on the left side of the linkage map) was calculated using the estimate of 1cM = 14.5 kbp (Kubisiak and Milgroom, 2006 *Fungal Genetics and Biology* **43**: 453-463). Markers linking the physical and genetic maps are connected by double arrows.

```

EP155 MASMTLQQICQSTICNTIPVGCRRKRTSPAQHGSTSLKESVSESQCFICAOVWDSLSKEQKAITAQPTEFMGTQYEITLKRDSVAELGDNA--VM 88
EP146 MS---LORKCOATPDTRICSGEHRVVVRHDSASIQKSVEDRCYICARVWNSLSEEQKAVCKRPTFEGIVYKMYTRDQSYGGSNAHSRPIL 87

AGLMCEEG--DDLYECEYKVVGGWWRGFTGQFSILNPAKFPVDKVVDLPETTNHPSQWNTVAKWVENCRSNHKTCDLHQGTGWLKRLVD 177
AQLLCCPAKDDLYDCDDYNEVGGWWRNEAGAFALNPSIFPVHEVVELSDSTNDSSSWVSVTWIERCRSEHKTCSESYKTDWVETRLVD 177

LENYGDCQVRVVLSSALEFGNQDVRYLALSHCWGRTPFLVLDGHEELFANGVLVTSLAQNFQDALFATGKLGFRYIWIWDSLCLIQGSRDD 267
VSQFEQYVVCVTTSLFLQPRGHPYLALSHCWGKKRFLVFNEETKAKFESGVAISSLAQNFQDAIFTHRLGFRYIWIWDSLCLIQGSRKD 267

WMQOAPLMNKVYRNASTLTCATASPDHGGFFCNREPAFVRBHPFTLRTEAEGLVEGLIKSDFWETDIRRAPINQRAWVWQERLLAPRS 357
WAEQOAPLMNKVYKNAVLTLCAMASAEAEAGGFERSRDEPKIRECPFRVNTSEGLDCLVVKSDFWETEVLHAPISKRAWVWQERLLAPRS 357

LCFGQNLFWECQELQACEVFPNGIPKEFISDIQHPDTIDAVSIKAFRRTISWLADPTIDKTYAD-PELDTMRWYDSPYQVWDEILQLYS 446
LYFGQSQLYWECQEAFAACEVFPDGVPLAEVSEIADIEAVDVVFPKAFIRTAGALVNPITDQEDAKLHETDLDREYESPQVWNEILHSYV 447

SCALTQGGDKLVAISGIAKDLAVYLDDEYLAGLWRKMLDGLLWRVERDEMTGAYIPAKRPPQRYRAPTWSWASVDAIRTRAHT-AVFGEV 535
RCGLTKPEDKFAISGVVKDFADVVGDEYLAGLWRKMLDGLLWHVQEEELTGLYVPATRVEPYRAPSWSWASVDSPHVRVQSRHLTYD 537

HDGYTELVDVHVVPKGS-----FTGELDHACLARGHLVRRTRKPVDPRIARHDLFGTFYPDSYDEVITGDEEYCLPLR 609
DSGYAAIDEVNLVPRNEEKEEEEKGGGGGAPGFPAGELSHACLRRAGYLIRTRPPVDRNA-LGSFCQFYPDT-EALEGDVFCWPLR 625

EDLCAKLF---ITGLVLMPPFRDSTVTGFAAAGAAATS-----SCSRCAGKMLLVRICTFELAKGDPLQALGLVKPDNWAECGPEGVHL 690
ERINDGDVSGNYLMGLVLGTHPEAAGEEEEGEDADAATNRKRTSCDRGSGQRVFTRVGTFEIDHGDPLOQLSMKKPNWADWGEKDH 715

WELPDHPVSEFVIL. 705
WEPEDAQPYEFIVV. 730

```

**Figure S5** Amino acid alignment of *vic6* alleles in strain EP155 (*vic6-2*) and in strain EP146 (*vic6-1*). Note the high level of polymorphism that spans nearly all of the predicted protein (53% identity). The conserved HET domain found in this candidate *vic* gene is underlined. Amino acid identity is indicated by the solid background, while dashes indicate indels.

```

EP155 MGKKGAGENSKKAQGQARKADAAAASKAAAEDAKKSAAEAAEWEKGAKKGNACKENAEKKAAEAARKKAEREALLAEEKNTPGRSAPKN 90
EP146 MGKKGAGENSKKAQGQARKADAAAASKAAAEDAKKSAAEAAEWEKGAKKGNACKENAEKKAAEAARKKAEREALLAEEKNTPGRSAPKN 90

AKSAVKKTKGLDQALGQLDN--DAPLPTLNASGIENAI DALGLTDSKP-SLKIDRHPERRQWKYDEWKLRRLEKEMEANDPDWEQKKKYR- 176
AKSAVKKTKGLDQALGQLDGRDQGPLSALNASGIEEAI DALGLTDSSSKVTEIDKHPERRIGK----AYKTWKENNPNREKELQKQGFAY 176

NALSESLWKEWKNSPENPTNOVHAAYNSTQEDIAQIRAQMSKDTTEKRLASK. 228
NKRQDVLYQEFLESDNPMKQVSAKYNAFREELQATQAEKRKIIEERLGSKRGA. 231

```

**Figure S6** Amino acid alignment of alleles *pix6-1* and *pix6-2* in strains EP146 and EP155, respectively. Note the highly conserved N-terminal region and highly polymorphic C-terminal region. Amino acid identity is indicated by the solid background, while dashes indicate indels.

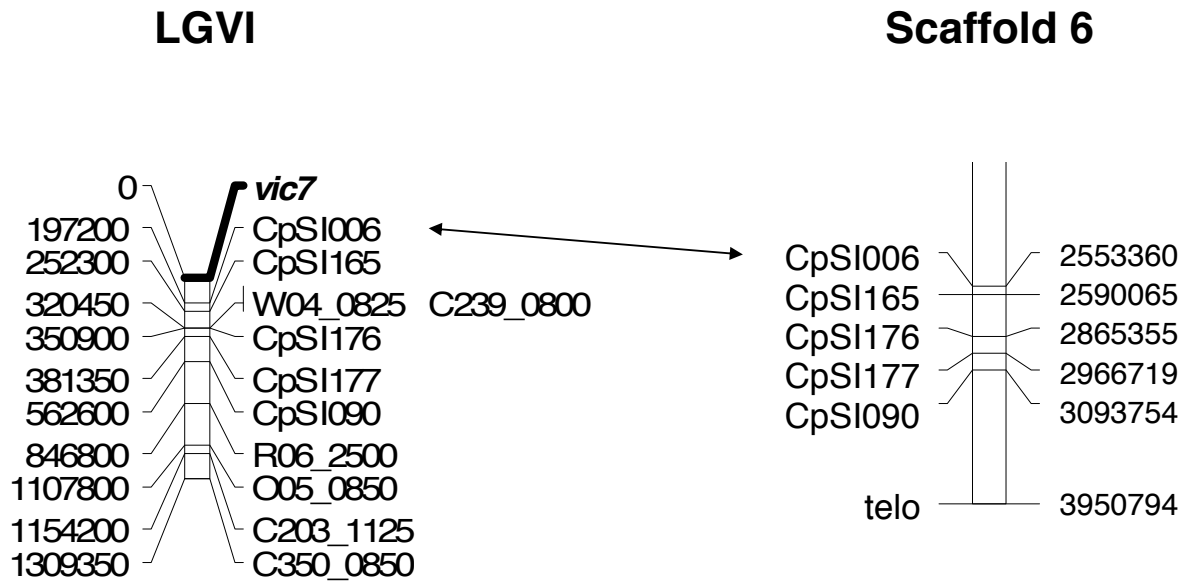

**Figure S7** Alignment of linkage group LGVI of the *C. parasitica* genetic linkage map generated by Kubisiak and Milgroom (2006 *Fungal Genetics and Biology* **43**: 453-463) that contains the position of the *vic7* genetic locus with Scaffold 6 of version 2 of the *C. parasitica* genome sequence. The estimated physical distance (bp) of each marker from the end of the linkage group (shown on the left side of the linkage map) was calculated using the estimate of 1cM = 14.5 kbp (Kubisiak and Milgroom, 2006 *Fungal Genetics and Biology* **43**: 453-463)). Markers linking the physical and genetic maps are connected by double arrows.

```

EP155 LAPVKTRRPIAADELSQETVLSVKKWIQECSNNETRS HMLCSLSGPRYLPSRLVEVQFDSSGLHLKLVIRGENLNPDACYTALSVCWGND 90
EP146 LAPVKTRRPIAADELSQETVLSVKKWIQECSNNETRS HMLCSLSGPRYLPSRLVEVQFDSSGLHLKLVIRGENLNPDACYTALSVCWGND 90

EVLAKALKTENLESYETEIPWETLPOTLQDAAVTTHRLGMHFVWIDSLCI IQDDNDKVKETAQMAQVYSHATLTIMV NRAARASDGFT 180
EVLAKALKTENLESYETEIPWETLPOTLQDAAVTTHRLGMHFVWIDSLCI IQDDNDKVKETAQMAQVYSHATLTIMV NRAARASDGFT 180

HQRSPPLGTSNLLFRSPDGTEGWVSLYFKHEFWHEEKSKLDRGWAMQEHLLSRRTLEIGTYMTEWSCRTERGLF SHSDGWSNDRLTRCF 270
HQRSPPLGTSNLLFRSPDGTEGWVSLYFKHEFWHEEKSKLDRGWAMQEHLLSRRTLEIGTYMTEWSCRTERGLF SHSDGWSNDRLTRCF 270

GSPFQNRARRWSADGGGRSMPEPSLAETNKTSWLED SHILDVIMFSSANPDHQHPRFSVRGVLDTWEMVVKAYCDRSLSLPTDKILAIS 360
GSPFQNVTKWSTDDGRGRSTP-----ETSWLED SHILDAIMFSSAHPDHQHPRFSVRGVLDTWEMVVKAYCDRSLSLPTDKILAIS 352

GIAERFASSTPGIGRYAAGLWEEGLPTSLMWTWDPSPSRPTEYQGPSWSWTAIRSRIWFEGAYGSLVSEILSVECVPLHPEAPFGALKS 450
GIAERFASSTPGIGRYAAGLWEEGLPTSLMWTWDPSPSRPTEYQGPSWSWTAIRSRIWFEGAYGSLVSEILSVECVPLHPEAPFGALKS 442

GTLRIKGPAIDIERRENEGLSSDARSSTLRIEPAVGIEGRENQGLSEDAARRGYTRGWRCLGVDETYVDLDHYVRLTLLDIADDVVDWAAEV 540
GTLRIKGPAIDIERRENE-----SLSNAHPSHGHGWRCLGVDGAYVDEDDYVRIHLELSDDDVEDWTAEM 507

TFLAIKRMVRLEVEQRYGLILRQEAANGSWHRIGFTLSHFDEPKPYEPIITADWPKREFTIV. 602
ALAIIEASERMEVEQRLGLILRQVSNDSWHRIGTVEFRIDPEKPYEPIITADWPKREFTIV. 569

```

**Figure S8** Amino acid alignment of candidate *vic7* alleles in strain EP155 (*vic7-2*) and in strain EP146 (*vic7-1*). The alignment was performed using MegAlign in Lasergene (DNASTAR Inc., Madison WI) with manually annotated amino acid sequences. Note that, in contrast to *vic2*, *vic4*, and *vic6*, the *vic7* alleles are quite similar to each other, except in the C-terminal region. The conserved HET domain found in this candidate *vic* gene is underlined.



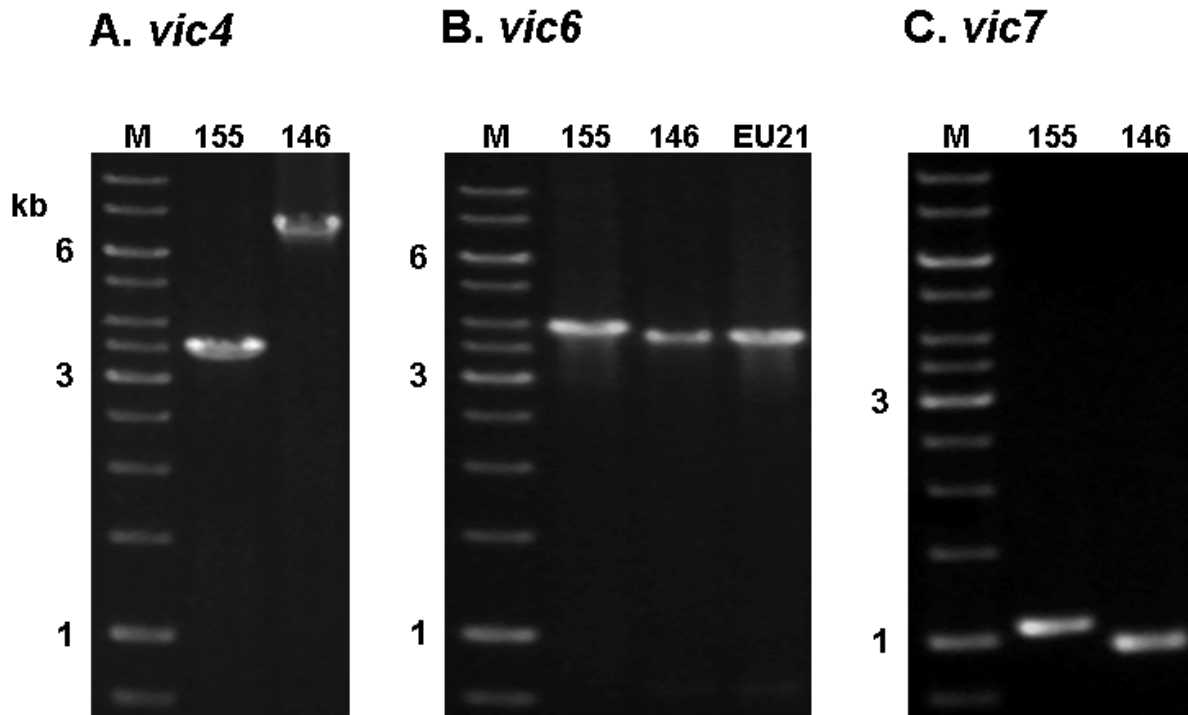

**Figure S9** Agarose gel migration of candidate *vic* allele-specific PCR fragments. The relative migration positions of PCR products for *vic4-2* (3,456 bp from strain EP155 DNA) and *vic4-1* (6,884 bp strain EP146 DNA) are shown in Panel A. The candidate *vic6* allele-specific PCR product *vic6-1* (3,780 from strain EP146 and *vic* tester strain EU-21 DNAs) migrates slightly faster than the *vic6-2* PCR product (3,948 bp from EP155 DNA) as indicated in Panel B. Confirmatory nucleotide sequence analysis of PCR fragments was performed when differentiation based on relative migration was in doubt. The migration positions for candidate *vic7* allele-specific PCR products for *vic7-2* (1,053 bp from EP155 DNA) and *vic7-1* (954 bp from EP146 DNA) are shown in Panel C. Nucleotide sequence differences were also used to distinguish the candidate *vic2-1* and *vic2-2* alleles and the adjacent *sec9*-like gene alleles *vic2-1a* and *vic2-2a*. The lanes marked M contained the 1 Kbp DNA ladder size markers (Fermentas, Glen Burnie, MD).

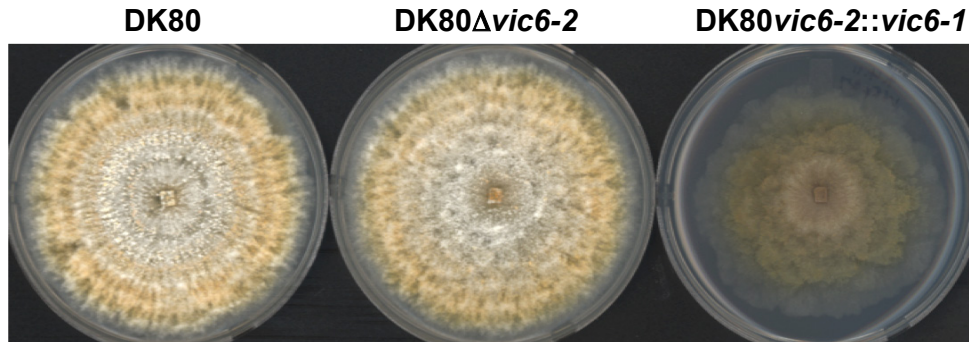

**Figure S10** Colony morphology for disruption strain DK80  $\Delta vic6-2$  (middle panel) and replacement strain DK80 *vic6-2::vic6-1* (right panel) in which the disrupted *vic6-2* allele was replaced with an intact *vic6-1* gene. The *vic6-1* replacement strain DK80 *vic6-2::vic6-1* exhibited abnormal colony morphology, irregular margins, reduced aerial hyphae, reduced biomass production and reduced conidiation. All candidate *vic* gene disruption mutants examined in this study showed normal colony morphology.

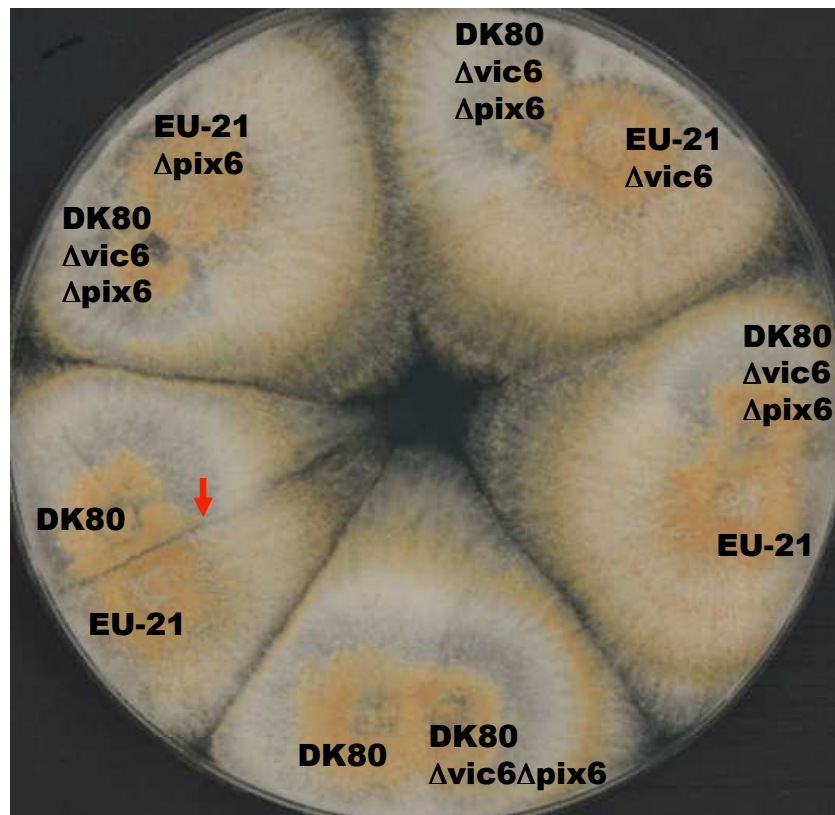

**Figure S11** Mycelial incompatibility assay for strain DK80 disrupted in *pix6-2* and *vic6-2*. Barrage formation (arrow) resulting from an incompatible reaction between strains DK80 and EU-21 that differ only at the *vic6* locus is shown in at the lower left. While barrage formation is retained when only *vic6* or *pix6* alleles are independently disrupted (Table 5), the double disruption mutant DK80  $\Delta$ *pix6-2*  $\Delta$ *vic6-2* is compatible with strain EU-21 with no evidence of barrage formation (middle right) and no restriction to virus transmission in either directions (Table 5).

**Table S1 Single Sequence Repeat (SSR) linkage markers used in this study**

| Linkage Marker | vic  | Forward primer       | Reverse primer       | Scaffold map positions* |
|----------------|------|----------------------|----------------------|-------------------------|
| CpSI002        | vic2 | TTGGATAGACCCAGGTGTCC | GAGGTCTTCGAGGGCGTAG  | 7:1522713-1523193       |
| Co16_1800      | vic2 | TGGCGGGATATGAAATAT   | TGTTGGAGCGCCTTGC GGA | 7:1762655-1763779       |
| CpSI116        | vic4 | TGTCAAAGTTGACCACCACC | ATCAGCGTGTCCATACCACA | 4:345343-345591         |
| CPG3           | vic4 | CGTAAGGCAGAGGCAGAGAC | TCCCTATGCCCAAGACTC   | 4:1897980-1898174       |
| CpSI135        | vic6 | TACTCTTCGTGTCCCTTCGG | GGCAGAACAGTGACCGAAAT | 3:5015099-5015384       |
| CpSI136        | vic6 | AAGCTGTACAGTCAACGCGA | ACCTGGAATGGAGACACAGG | 3:5033364-5033641       |
| CpSI006        | vic7 | ATGTCGAGTTTACCCGATGG | GAGATGTGTGGAATGCAACG | 6:2553319-2553459       |

\* The map positions define the fragment containing the SSR region that would be amplified from *C. parasitica* genomic DNA. (KUBISIAK T. L., C. DUTECH and M. G. MILGROOM, 2007 Fifty-three polymorphic microsatellite loci in the chestnut blight fungus, *Cryphonectria parasitica*. Mol. Ecol. Notes 7: 428-432)

**Table S2 Oligonucleotide primers used in PCR reactions\***

| Gene         | Primer      | Nucleotide sequence         |
|--------------|-------------|-----------------------------|
| <i>vic2</i>  | ptnF1       | 5'-TGCGGCACCTGCATGTACATA    |
|              | ptnR1       | 5'-CGTCATACAGGCGAACTGGAT    |
| <i>vic2a</i> | sec9F1      | 5'-TACTCCTTCCCAAGCTCCCG     |
|              | sec9R1      | 5'-GCTCAACGTATGTGGTTCAGCAT  |
| <i>vic4</i>  | vic4F1      | 5'-CCATGCATGTGAGGCTTCTCA    |
|              | vic4R1      | 5'-CTTGATCGTGGAGTTCAGTCG    |
| <i>vic6</i>  | vic6F1      | 5'-GACCAGGCTCTTGGGCAGCT     |
|              | vic6R1      | 5'-CGAGACCCTTTGTTTCTAAGGTCT |
| <i>pix6</i>  | vic6upF1    | 5'-GTGCAGGTCCAGCTGACTTG     |
|              | vic6up155R1 | 5'-TGTACAGCGTGGCCACTGAC     |
|              | vic5up146R1 | 5'-AGGCCTTTGAGGATGGGGTT     |
| <i>vic7</i>  | vic7F1      | 5'-CGTACACTTGAGATTGGGACTTA  |
|              | vic7R1      | 5'-ATAGGGCTTCTCGGGATCGA     |

\*A Phire Plant Direct PCR kit (F-130) (New England BioLabs, Ipswich, MA) was employed in a 50 µl reaction volume with following parameters: denaturation at 98<sup>0</sup> C for 2 min followed by 30 cycles consisting of denaturation at 98<sup>0</sup> C for 5 sec, annealing at 64<sup>0</sup> C for 5 sec, extension at 72<sup>0</sup> C for 2.5 min, and then final extension at 72<sup>0</sup> C for additional one minute. The resulting PCR products were sequenced after purification with a QIAquick PCR purification kit (Qiagen, Valencia, CA).
