# Supplementary material
Source: PubMed Central journal article supplement (PMC3249360)
Supplement: supp_111.133983_FigureS1.pdf [file supp_111.133983_FigureS1.pdf]

**EP155** MSFSDEKEP V N L L A L D G G G I R G V S E L I I L D E L M K Q I Q I R G N L A R V P R P C V Y F H L M G G T S T G G L V A I M L G R L E M S T E E A L S A Y D K F A Q E I F 90  
**EP146** MSFFDEKEP I N L L A C D G G G I R G V S E L V I L H E L M K A I Q E K G E F A R M P K P C D Y F H I I G G T S T G G L V A I M L G R L E M S T E E A I A A Y D G F A S D I F 90

S K K N R N M L N P A E K Y G A V A L E Q T V Q K L V H D C Q K G P S M R D C R P Y T A K G R A F V C T M P Q H D R N A T V R L R T Y D V E G D K F S K C Q I Y Q A A R A T T A A S 180  
 S K R R P S L V --- E K Y K A K Q L E A T V Q R L V R D Q G K G I L M R D G R P R N S K G R A F V C T M P E Q K H R Q T V R L R A Y E A A G D K Y P N V L I Y E A A R A T T A A T 177

T F F K P M P I Q N D Q G V V T N F V D A A L G R N N F V G I L L E E A G S L F G T R R R L G C V V S L G T G S R K T E L A K - G K S K A K Q L V S L L S V L K E I S T D T Q R D H 269  
 T Y E R P M S I R D E D G R E E R F V D A A L G M N N F I S I C L E E A A E L F G P Q R M L G C I V S L G T G S R Q V E M R P Y G S G S I R Y L W R T I K V V K E I G T D S E K D H 267

E R M L S M L K F P D T Y F R L N V D G G A E K I S I D D W G K I G L L K E R T R K Y L Q D K A V A D C I D K L A K A L R G T S H G L T L A H L G C L D K D V I I R D T Q K A K 359  
 E K I R A H F A D Y D N T Y F R E N V D G G A Q G I E L S D W Q K I G E L K E R T R A Y L Q T P D V K K S I D D L A D V I V H H R T H G L T L N Q G R G I N K N M T I P A Q P R F I 357

E R G R A S T I F T G R A T I I L K T I R E H F N R Q D S G D V S R R E F Q L W G M G G V G K T Q I A L K F S E E F E R N D Y K I L W I D A T D V Y T I E Q S Y L R I V E K D L Q P E 449  
 R R G R S S N T F T G R D N I L R R L D E C F E P R A P G N T S R R E F Q L R G M S --- R A K L G M C T A A L M R G I R F H I I W I D A T D K V T I E Q S F H H I A T S Y F G T E 444

N R G D G A I T R L L G K L E A S D K W L L V F D N A P E R G L G P W I P D G N S G N I Y T T R L K H L E R L A P N C V S Y V D Q M D V A D G L T L L L R S A R M D E G E K Q Y 539  
 G D T Q P V E K V I N W L K E T A E E W L L V F D N A P D S G L F R Y R P D G D I G N F L Y T T R H Q N L Q P R L Q P F I Q D V E E M E I Q E A A Q L L I A S A Q V P S N I E A N 534

R D L A R P V A K E L G Y L P L A L D Q A G A C K L T I P C S K S S C T T P I F S F F P S F S R P S P L P P F F S V P R E L L T S C L P D I H M A P C P L E R F L E K F N N E K D A 629  
 R K V V D D I V K E L G L L P L A I D Q A G A Y ----- I H M A P C Q L D K Y L D V F N K Q K Q D 579

L L S N P M F R G B D N I R N L P I Y A T F N I S W D A I K A Y A D K R K D V E R A T E A L N A L Q L L N L L C F Y H N E G F I A Q M F G Y A A K N R A V Y D L T S A H P L E A E G 719  
 L L K D P Q F T G D E A R H I A V Y A T F N I S F K A I K T S S E K R G D L T K A R H A E V A L M L L R L L C F Y H N E G L L F V V E L Y A A K E R H K L D R N T Y F V K A G D 669

I S L E H L I H M S Y T E D - F D M P - G N E W N R G G F D M G I R F L E E F S L L K H D Y R N L H T N M H I L V H E W A R R L T P G Q R A E W G G A A R I L L D S F N F E S L 807  
 V D I N E L V E I T E Q D I S P E F E D G Q A W N I G W I E S V K L L E E F S L I K F N A S N G Y S S M H V L V H D W A R S C M E D E E K R E W A L A A R C L L M D S I S L G T D 759

G S I A H R R E M V V H L D A C V R F V D P D N Q K V D L E P E Y H F N I A N I Y E A A N R F E D A R L A R E K S T F F A L R R A A G F F T E N V L M Y M Y M Q A D D Y G S H C D 897  
 R L S A H W H K L I M P H L Q V V M K Y A N I P H A D L G L E S E Y Q I R M A R A L R Q S H K F K H A N T A L Q Q A L D Y R - K K Y F G I D D L H T F D V M R H L A R L Y E D Q G L 848

I A Q A E Q M Y L E I L D R F Q L I V D Q A K W Q I P S R K G K R S M L K L S R D E K N A D N R R E V L D F N L A R D T K A S L A F L Y F E Q G H Y E S A E P H L L D I L E W A 987  
 F A E A E S M L L E L I D R R R L Q I R D K M W T A A L E T N S T --- D A T R E V E M P A F Y S E K L L D N A A L N T D T K Q L L I V L M K M D S R Q A A E K V M V D L L K W T 934

K Q D T G R E K E R A V I R A R D Y L A T I A N P S G A R P S E T S --- E E A K A K Y L A R E E S G S D S F G T Q S L R R N F A I Q I V R E G K L B E A L D E Y H P I W L W Y 1073  
 S E K F G E D N S K T R F W Q - D T L D Q F R R G L D V R D T E D S T L R V E R A R E E V K V K S E Q Y G P F E P Q T L G A E R Q L A K A L E L D G A F Q E A D D R L T Y I I E Y C 1023

C D K Y G K E S N K T R Q V L D A M V L T M H K V A P C H G F T A N V L I M S F S W N H F T F G P Q H L E T L E S R G V L A D V L C D M C A L G K A L E L A E G S V K I A R A I Y G 1163  
 E L I Y G K H S L Q H I D A I F A M A K S L N Q Q M R P Y - E A D E I L V T V L D R Y G T L L G Q Q H P K T L E A R Y E I G F N R F L R S D Y T G A I E A M K E C Y D R R K E V L G 1112

E G G R T T L Y H I D E Y R R I R E L Y E T M P L F I R L R V I Q D K I L E E K K A P L T F G P L H E Y S E K L A D E P H P I A T P L T P E G T E V R V V K E E I P L T F G V A L 1253  
 S D H W L T K M T G V H L A H F Q H M D K M V P P W N R D - S L K E I A V E N ----- T -- L K N M G D L A P E W M K Q W K P ----- G M C L 1172

R Y K Q L D V A A A D F Q I P S L E A I I P D T W L L C R D A K S D P K - F R D P G P F F N D R F L K R Y K E G L . 1311  
 E N - A V S I S P N S E N F - S ----- I L C R T R R G D H A G S G C P G . 1204

**Figure S1** Amino acid alignment of candidate *vic2* alleles in strain EP155 (*vic2-2*) and in strain EP146 (*vic2-1*) performed using MegAlign in Lasergene (DNASTAR Inc. Madison WI). Note the high level of polymorphism that spans nearly all of the patatin-like protein (39% identity). A region in the N-terminal portion of the ORF (aa 13-212 in the EP155 sequence) containing a patatin-like phospholipase domain (PLA2; EC3.1.1.4) consisting of the esterase box GTSTG and anion binding element DGGGXRG (Scherer et al., 2010 Patatin-related phospholipase A: nomenclature, subfamilies and functions in plants. *Trends in Plant Science* 15:693-700), and conserved in both the *vic2-1* and *vic2-2* alleles, is underlined. An NB-ARC, or P-loop NTPase domain, detected in the EP155 genome sequence but not in the EP146 sequence, is indicated by an overline extending from aa 396-561. Amino acid identity is indicated by the solid background, while dashes indicate deletion events.
