# Supplementary material
Source: PubMed Central journal article supplement (PMC3249360)
Supplement: supp_111.133983_FigureS2.pdf [file supp_111.133983_FigureS2.pdf]

```

EP155 MGFFSKKKKDGNANPYAQDGAQVPFSNPLTPYQARNDLAQGRPAGLSSSTAPTASNTPPPSYHSPSIASSRYGDEKYGNCKGYCTDRYG 90
EP146 MGLFSKKKKDAEANPYAQAG-----TAFAPAVSNTPPPSYHSPSIASSRYGDEKLCTCNGYCADRYG 62

STGSGPAPGGYGGFNSDAGNNRSQASAAQPAGGDRNPALFGNAQERYNPYGGSKPQAQSGPQGDEYGGYGAPRELTEEEQAEAQAHVD 180
---SGPAPGGYGGFN-FAGNNRSQASTATPAAGDGNPALFGNAKDRYNPYGGSKPQAQSGPEGDEYGGYGAPRELTEEEQAEADTQALVD 148

EAHGVRNESIAALQRTLAMGNQAFEQATGTLVRIDQQDEMMFNANKNLDSSLAHARDCQAKTKTLRKLNDTPFFIPVE-PGRKAQDKLAE 269
QTNAVRDESWASIQRTIGGIEGGLAQVQASRMRVAQDSRLNNAERNLDCSLSHARDCACKTKTLDTLNRKPFFMPVGGTSVKAVERQVA 238

MAVLNNRQDREQRECTLQAGYTDRKMEQDMQLAR-ASSGPRLLGAGKPAN-KFALEDDEEGAQEEQIGLMDDVLVSKNLNMASSA 357
QETEEHSGDKAKAEVTRQA----RWEIEKRLKAAEKNGPTAFGLLGSKKPVDSKWVFEDDEEGAAKEENIQAGIETLGYLSGLNSQASA 324

MTGKLERSIAQINDVSGKVCSPFRTLLQSRSLTSGAG. 395
LGDDLQCSIKVINRVVDKVSPFPRWLQTNLLTFDAG. 362

```

**Figure S2** Amino acid alignment of the Sec9-like protein candidate *vic2a* alleles in strain EP155 (*vic2a-2*) and EP146 (*vic2a-1*). Note the large indel near the N-terminus and the high level of polymorphism in the C-terminal half of the coding region. A Pfam DUF3359 domain, found only in the EP155 allele, is indicated by a line above the EP155 sequence. Amino acid identity is indicated by the solid background, while dashes indicate indels.
