# Supplementary material
Source: PubMed Central journal article supplement (PMC3249360)
Supplement: supp_111.133983_FigureS3.pdf [file supp_111.133983_FigureS3.pdf]

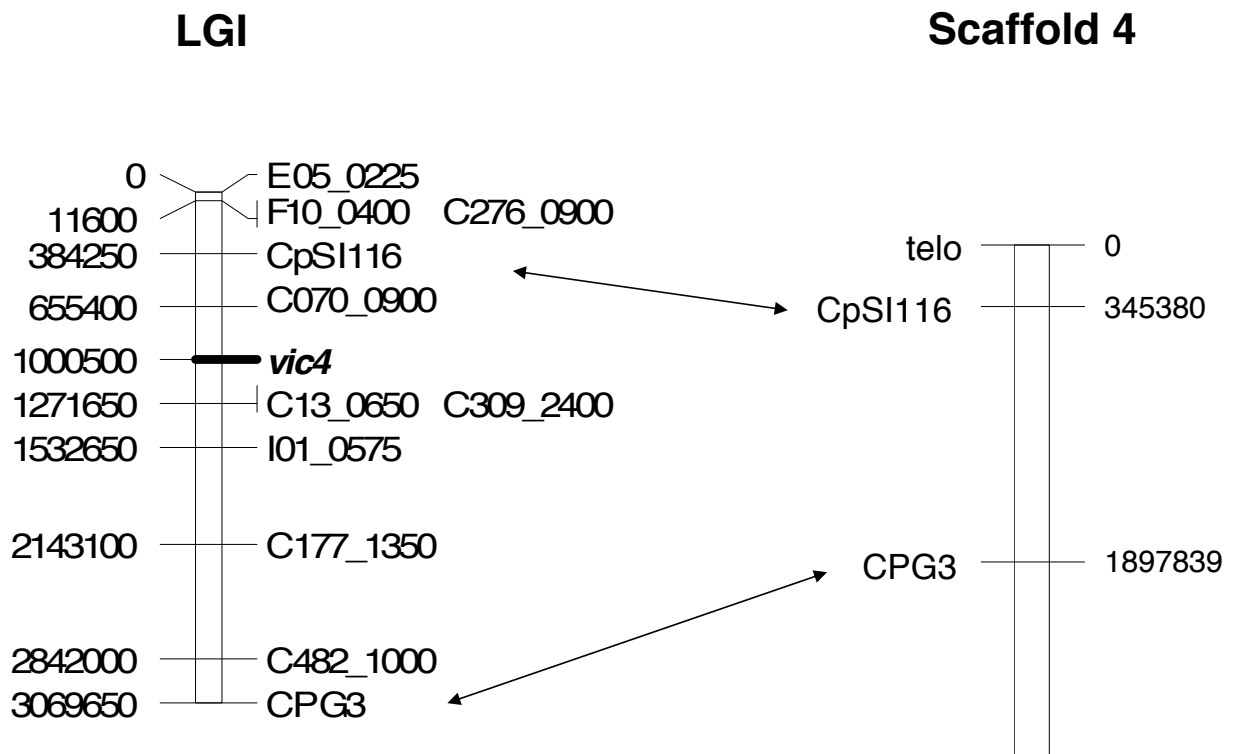

**Figure S3** Alignment of linkage group LGI of the *C. parasitica* genetic linkage map generated by Kubisiak TL, Milgroom MG (2006 *Fungal Genetics and Biology* **43**: 453-463) that contains the position of the *vic4* genetic locus with Scaffold 4 of version 2 of the *C. parasitica* genome sequence. The estimated physical distance (bp) of each marker from the end of the linkage group (shown on the left side of the linkage map) was calculated using the estimate of 1cM = 14.5 kbp (Kubisiak and Milgroom, 2006 *Fungal Genetics and Biology* **43**: 453-463). Markers linking the physical and genetic maps are connected by double arrows.
