# Supplementary material
Source: PubMed Central journal article supplement (PMC3249360)
Supplement: supp_111.133983_FigureS6.pdf [file supp_111.133983_FigureS6.pdf]

```

EP155 MGKKGAGENSKKAQGQARKADAAAASKAAAEDAKKSAAEAAEWEKGAKKGNACKENAEKKAAEAARKKAEREALLAEEKNTPGRSAPKN 90
EP146 MGKKGAGENSKKAQGQARKADAAAASKAAAEDAKKSAAEAAEWEKGAKKGNACKENAEKKAAEAARKKAEREALLAEEKNTPGRSAPKN 90

AKSAVKKTKGLDQALGQLDN--DAPLPTLNASGIENAI DALGLTDSKP-SLKI DRHPERRQWKYDEWKLRRLEKEMEANDPDWEQKKKYR- 176
AKSAVKKTKGLDQALGQLDGRDQGPLSALNASGIEEAI DALGLTDSSSKVTEIDKHERRIGK----AYKTWKENNPNREKELQKQGFAY 176

NALSESLWKEWKNSPENPTNOVHAAYNSTQEDIAQIRAQMSKDTTEKRLASK. 228
NKRQDVLYQEFLESDNPMKQVSAKYNAFREELQATQAEKRKIIEERLGSKRGA. 231

```

**Figure S6** Amino acid alignment of alleles *pix6-1* and *pix6-2* in strains EP146 and EP155, respectively. Note the highly conserved N-terminal region and highly polymorphic C-terminal region. Amino acid identity is indicated by the solid background, while dashes indicate indels.
