# Supplementary material
Source: PubMed Central journal article supplement (PMC3249360)
Supplement: supp_111.133983_FigureS8.pdf [file supp_111.133983_FigureS8.pdf]

**EP155** LAPVKTRRPIAADELSQETVLSVKKWIQECSNNETRSHMLCSLSGPRYLPSRLVEVQFQDSGLHLKLV~~RG~~ENLNPD~~AKY~~TALSYCWGND 90  
**EP146** LAPVKTRRPIAADELSQETVLSVKKWIQECSNNETRSHMLCSLSGPRYLPSRLVEVQFQDSGLHLKLV~~RG~~ENLNPD~~AKY~~TALSYCWGND 90

EVLLAKALKTENLESYETEIPWETLPOTLQDAAVTTHRLGMHFVWIDSLCIQDDNDKVKETAQMAQVYSHATLTIMVNRARASDGFT 180  
 EVLLAKALKTENLESYETEIPWETLPOTLQDAAVTTHRLGMHFVWIDSLCIQDDNDKVKETAQMAQVYSHATLTIMVNRARASDGFT 180

HQRSPPLGTSNLLFRSPDGTEGWVSLYFKHEFWHEEKSKLDRGWAMQEHLLSRRTLEIGTYMTEWSCRTERGIFSHSDGWSNDRLTRGF 270  
 HQRSPPLGTSNLLFRSPDGTEGWVSLYFKHEFWHEEKSKLDRGWAMQEHLLSRRTLEIGTYMTEWSCRKERGLSSHSDGWSNDRLTRGS 270

GSPFQNRARRWSADGGGRSMPEPSLAETNKTSWLEDSHILDVIMFSSANPDHQHPRFSVRGVLDTWEMVVKAYCDRSLSLPTDKILAIS 360  
 GSPFQNVTKWSTDDGRGRSTP-----ETSWLEDSHILDAIMFSSAHPDQHPRFSVRGVLDTWEMVVKAYCDRSLSIPTDRILAIS 352

GIAERFASSTPGIGRYAAGLWEEGLPTSIMQTDPSPSRPTQYQPSWSWTAIRSRIWFEGAYGSLVSEILSVECVPLHPEAPFGALKS 450  
 GIAERFASSTPGIGRYAAGLWEEGLLALLLWKTWEPSPSRPTQYQPSWSWTAIRSDVWFMTVLKPLVSEILSVECVPLHPEAPFGALKS 442

GTLRIKGPAIDIERRENEGLSSDARSSTLRIEPAVGIEGRENQGLSEDAARRGYTRGWRCLGVDETYVDLDHYVRLTLLDIADDVVDWAAEV 540  
 GTLRIKGPAIDIERRENE-----SLSENAHPSHGHGWRCLGVDGAYVDEDDYVRIHLELSDDDVEDWTAEM 507

TFLAIKRMVRLVEVQRYGLILRQEAANGSWHRIGFTLSHFDEPKPYEFTITADWPKREFTIV. 602  
 ALAIEASERMEVEQRLGLILRQVSNDSWHRIGTVEFRIDPEKPYEFTITADWPKREFTIV. 569

**Figure S8** Amino acid alignment of candidate *vic7* alleles in strain EP155 (*vic7-2*) and in strain EP146 (*vic7-1*). The alignment was performed using MegAlign in Lasergene (DNASTAR Inc., Madison WI) with manually annotated amino acid sequences. Note that, in contrast to *vic2*, *vic4*, and *vic6*, the *vic7* alleles are quite similar to each other, except in the C-terminal region. The conserved HET domain found in this candidate *vic* gene is underlined.
