# Supplementary material
Source: PubMed Central journal article supplement (PMC3249360)
Supplement: supp_111.133983_FigureS10.pdf [file supp_111.133983_FigureS10.pdf]

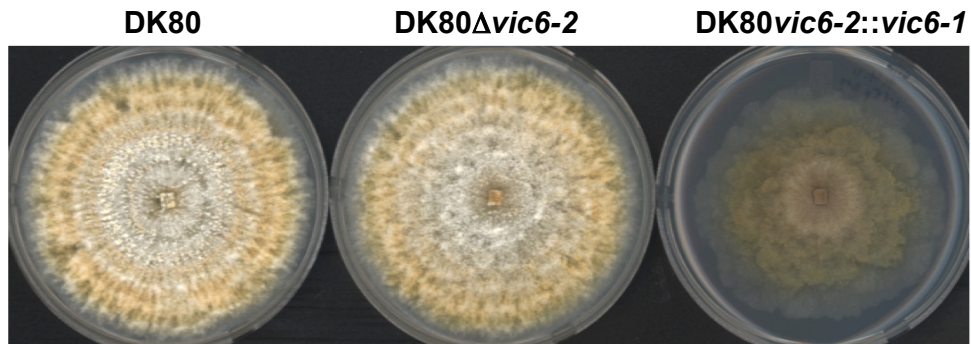

**Figure S10** Colony morphology for disruption strain DK80  $\Delta vic6-2$  (middle panel) and replacement strain DK80 *vic6-2::vic6-1* (right panel) in which the disrupted *vic6-2* allele was replaced with an intact *vic6-1* gene. The *vic6-1* replacement strain DK80 *vic6-2::vic6-1* exhibited abnormal colony morphology, irregular margins, reduced aerial hyphae, reduced biomass production and reduced conidiation. All candidate *vic* gene disruption mutants examined in this study showed normal colony morphology.
