# Supplementary material
Source: PubMed Central journal article supplement (PMC3249360)
Supplement: supp_111.133983_FigureS11.pdf [file supp_111.133983_FigureS11.pdf]

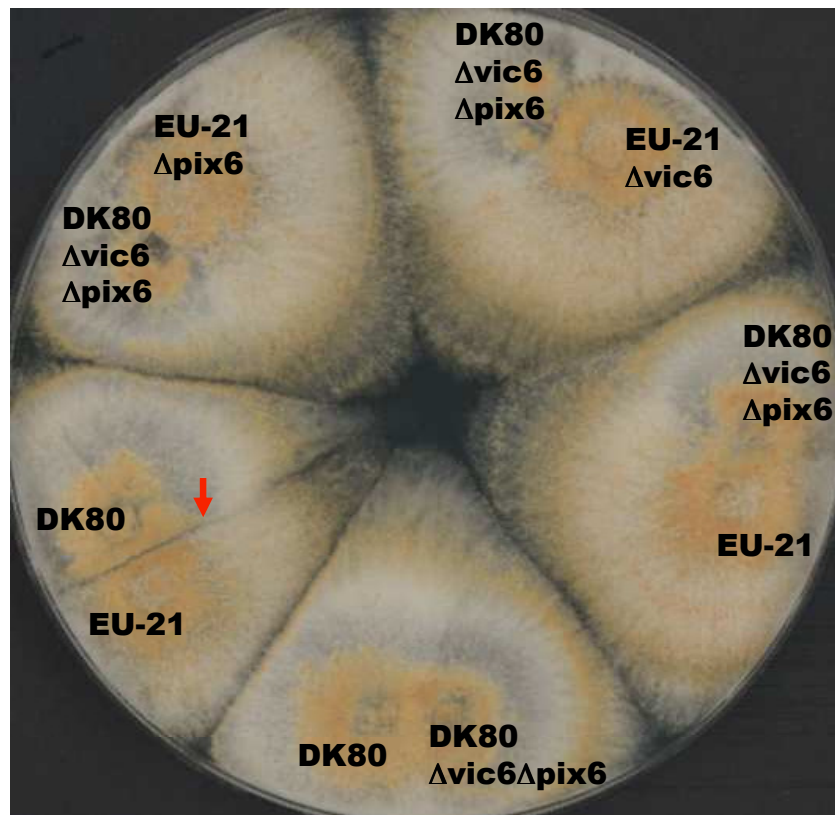

**Figure S11** Mycelial incompatibility assay for strain DK80 disrupted in *pix6-2* and *vic6-2*. Barrage formation (arrow) resulting from an incompatible reaction between strains DK80 and EU-21 that differ only at the *vic6* locus is shown in at the lower left. While barrage formation is retained when only *vic6* or *pix6* alleles are independently disrupted (Table 5), the double disruption mutant DK80  $\Delta pix6-2 \Delta vic6-2$  is compatible with strain EU-21 with no evidence of barrage formation (middle right) and no restriction to virus transmission in either directions (Table 5).
