# Supplementary material
Source: PubMed Central journal article supplement (PMC3249360)
Supplement: supp_111.133983_TableS1.pdf [file supp_111.133983_TableS1.pdf]

**Table S1 Single Sequence Repeat (SSR) linkage markers used in this study**

| Linkage Marker | vic  | Forward primer       | Reverse primer       | Scaffold map positions* |
|----------------|------|----------------------|----------------------|-------------------------|
| CpSI002        | vic2 | TTGGATAGACCCAGGTGTCC | GAGGTCTTCGAGGGCGTAG  | 7:1522713-1523193       |
| Co16_1800      | vic2 | TGGCGGGATATGAAATAT   | TGTTGGAGCGCCTTGC GGA | 7:1762655-1763779       |
| CpSI116        | vic4 | TGTCAAAGTTGACCACCACC | ATCAGCGTGTCCATACCACA | 4:345343-345591         |
| CPG3           | vic4 | CGTAAGGCAGAGGCAGAGAC | TCCCTATGCCCAAGACTC   | 4:1897980-1898174       |
| CpSI135        | vic6 | TACTCTTCGTGTCCCTTCGG | GGCAGAACAGTGACCGAAAT | 3:5015099-5015384       |
| CpSI136        | vic6 | AAGCTGTACAGTCAACGCGA | ACCTGGAATGGAGACACAGG | 3:5033364-5033641       |
| CpSI006        | vic7 | ATGTCGAGTTTACCCGATGG | GAGATGTGTGGAATGCAACG | 6:2553319-2553459       |

\* The map positions define the fragment containing the SSR region that would be amplified from *C. parasitica* genomic DNA. (KUBISIAK T. L., C. DUTECH and M. G. MILGROOM, 2007 Fifty-three polymorphic microsatellite loci in the chestnut blight fungus, *Cryphonectria parasitica*. Mol. Ecol. Notes 7: 428-432)
