# Supplementary material
Source: PubMed Central journal article supplement (PMC3249360)
Supplement: supp_111.133983_TableS2.pdf [file supp_111.133983_TableS2.pdf]

**Table S2 Oligonucleotide primers used in PCR reactions\***

| Gene         | Primer      | Nucleotide sequence         |
|--------------|-------------|-----------------------------|
| <i>vic2</i>  | ptnF1       | 5'-TGCGGCACCTGCATGTACATA    |
|              | ptnR1       | 5'-CGTCATACAGGCGAACTGGAT    |
| <i>vic2a</i> | sec9F1      | 5'-TACTCCTTCCCAAGCTCCCG     |
|              | sec9R1      | 5'-GCTCAACGTATGTGGTTCAGCAT  |
| <i>vic4</i>  | vic4F1      | 5'-CCATGCATGTGAGGCTTCTCA    |
|              | vic4R1      | 5'-CTTGATCGTGGAGTTCAGTCG    |
| <i>vic6</i>  | vic6F1      | 5'-GACCAGGCTCTTGGGCAGCT     |
|              | vic6R1      | 5'-CGAGACCCTTTGTTTCTAAGGTCT |
| <i>pix6</i>  | vic6upF1    | 5'-GTGCAGGTCCAGCTGACTTG     |
|              | vic6up155R1 | 5'-TGTACAGCGTGGCCACTGAC     |
|              | vic5up146R1 | 5'-AGGCCTTTGAGGATGGGGTT     |
| <i>vic7</i>  | vic7F1      | 5'-CGTACACTTGAGATTGGGACTTA  |
|              | vic7R1      | 5'-ATAGGGCTTCTCGGGATCGA     |

\*A Phire Plant Direct PCR kit (F-130) (New England BioLabs, Ipswich, MA) was employed in a 50 µl reaction volume with following parameters: denaturation at 98<sup>0</sup> C for 2 min followed by 30 cycles consisting of denaturation at 98<sup>0</sup> C for 5 sec, annealing at 64<sup>0</sup> C for 5 sec, extension at 72<sup>0</sup> C for 2.5 min, and then final extension at 72<sup>0</sup> C for additional one minute. The resulting PCR products were sequenced after purification with a QIAquick PCR purification kit (Qiagen, Valencia, CA).
